# Supplementary material for: Potassium Hexacyanoferrate (III)-Catalyzed Dimerization of Hydroxystilbene: Biomimetic Synthesis of Indane Stilbene Dimers
Source: MDPI journal article supplement (doi:10.3390/molecules201219872), 2015-12-18
Supplement: s1 [file s1]

# Supplementary Materials: Potassium Hexacyanoferrate (III)-Catalyzed Dimerization of Hydroxystilbene: Biomimetic Synthesis of Indane Stilbene Dimers

Jing-Shan Xie, Jin Wen, Xian-Fen Wang, Jian-Qiao Zhang, Ji-Fa Zhang, Yu-Long Kang, You-Wei Hui, Wen-Sheng Zheng and Chun-Suo Yao

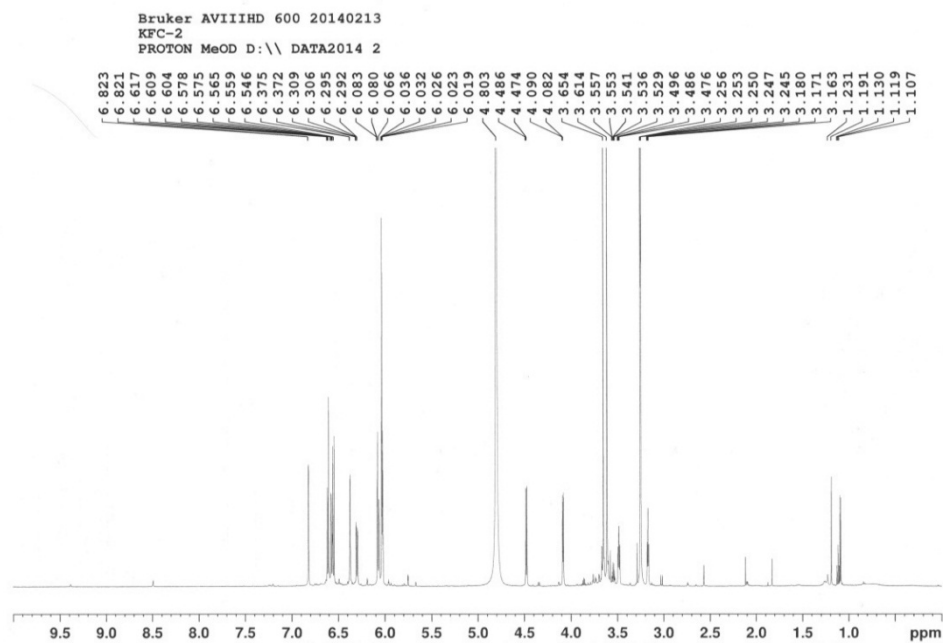

Figure S1. <sup>1</sup>H-NMR spectrum of compound (4) in CD<sub>3</sub>OD.

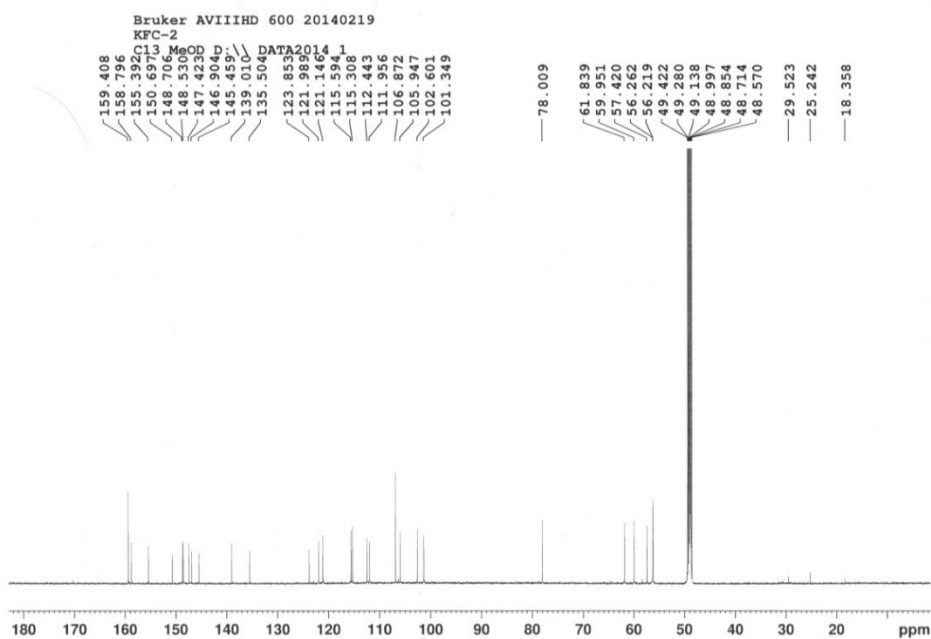

Figure S2. <sup>13</sup>C-NMR spectrum of compound (4) in CD<sub>3</sub>OD.

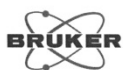

Bruker AVIIIHD 600 20140219  
KFC-2 DEPT MeOD D:\ DATA2014 1

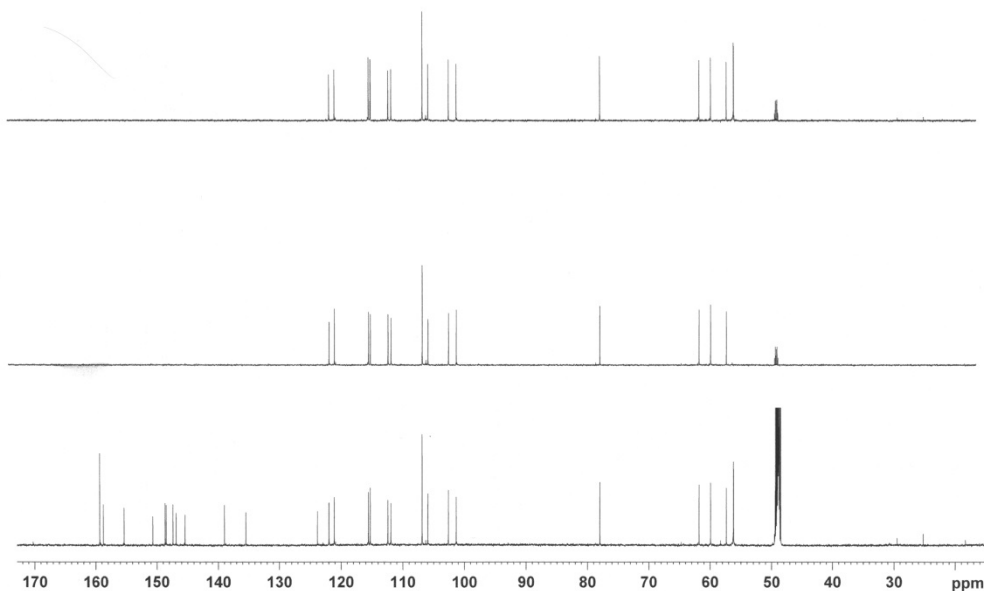

Figure S3. DEPT spectrum of compound (4) in CD<sub>3</sub>OD.

Bruker AVIIIHD 600 20140313  
KFC-2  
{H-H COSY} MeOD D:\ DATA2014 17

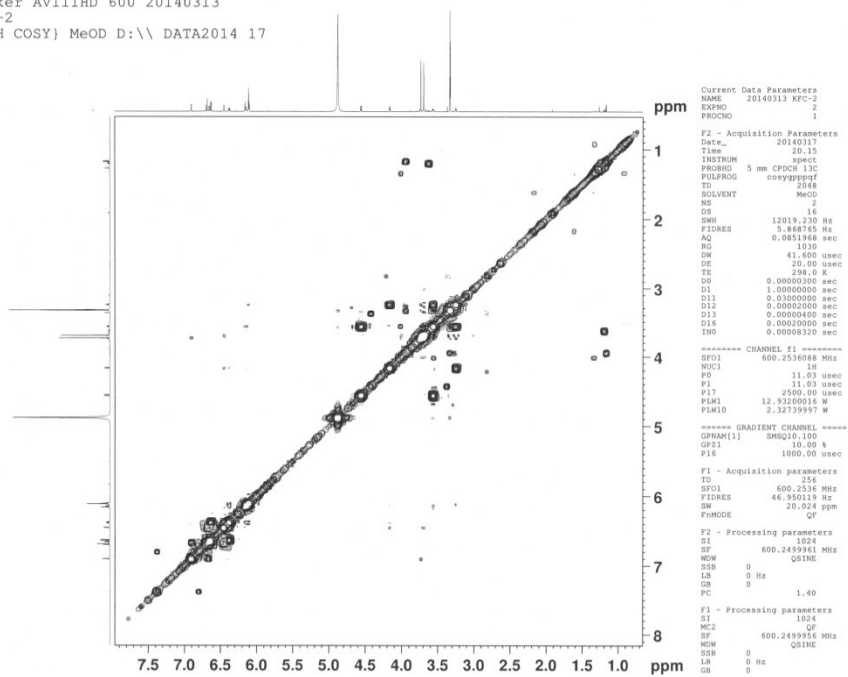

Figure S4. COSY spectrum of compound (4) in CD<sub>3</sub>OD.

Bruker AVIIIHD 600 20140313  
KFC-2  
HSQC MeOD D:\ DATA2014 17

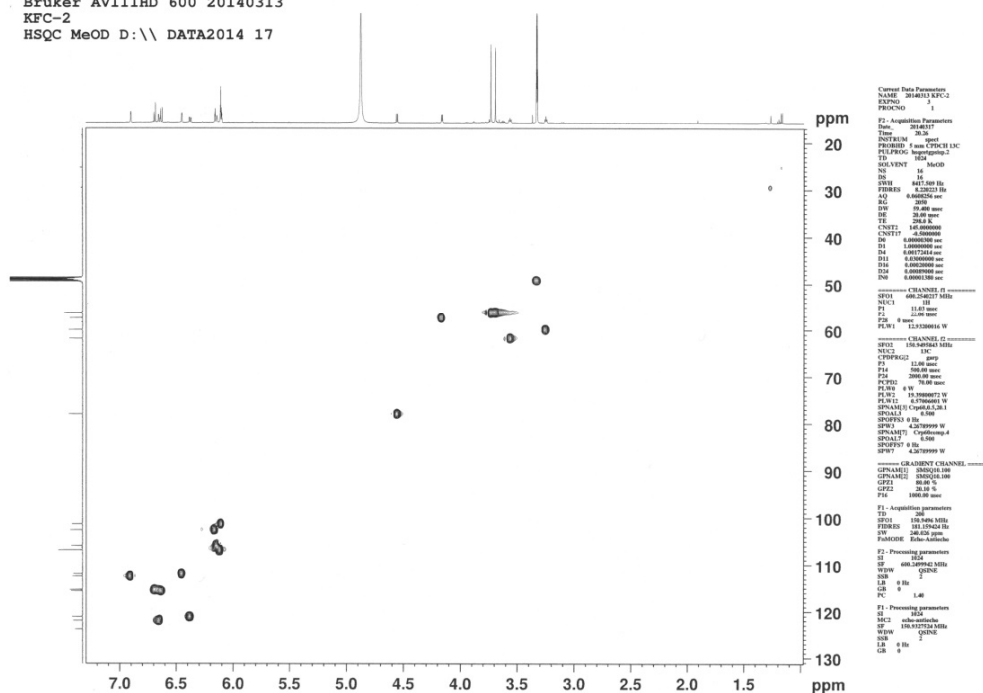

Figure S5. HSQC spectrum of compound (4) in CD<sub>3</sub>OD.

Bruker AVIIIHD 600 20140313  
KFC-2  
(HMBC etgpl3nd) MeOD D:\ DATA2014 17

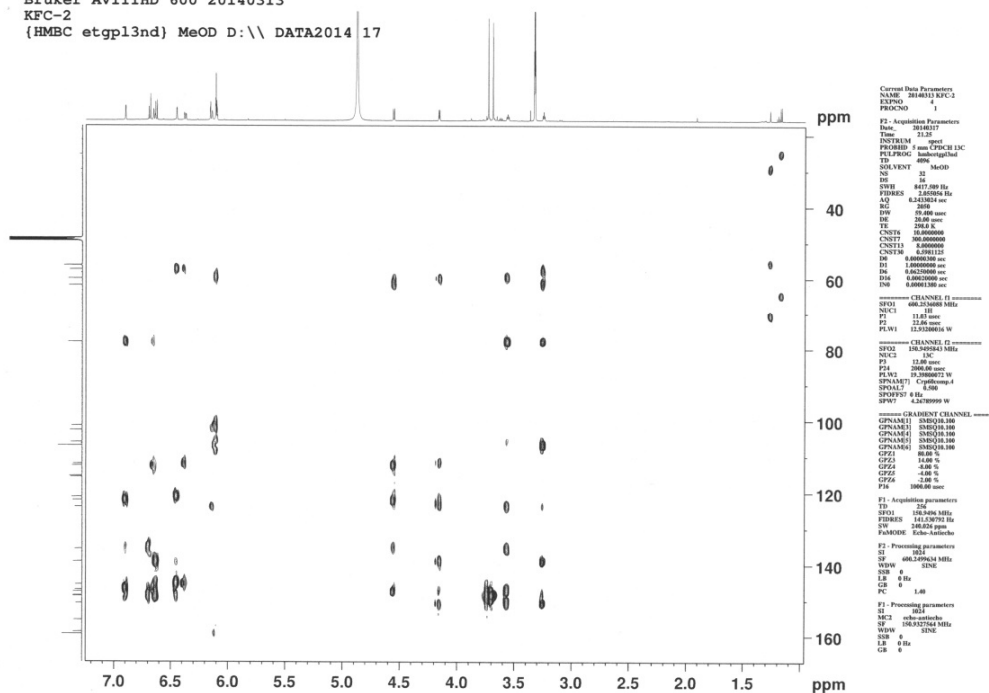

Figure S6. HMBC spectrum of compound (4) in CD<sub>3</sub>OD.

Bruker AVIIIHD 600 20140219  
 KFC-2  
 NOESY\_2D MeOD D:\ DATA2014 1

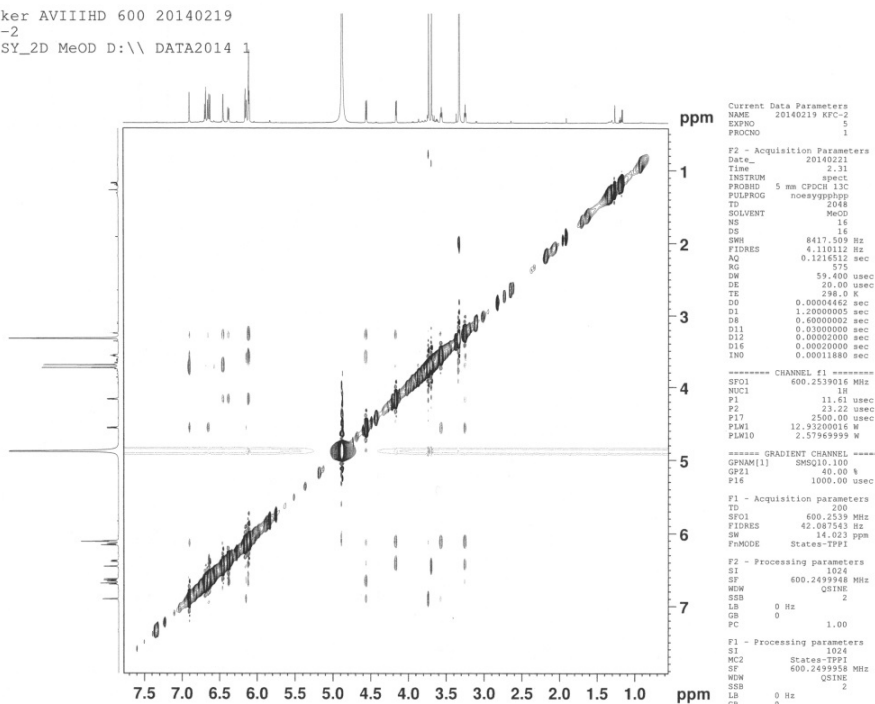

Figure S7. NOESY spectrum of compound (4) in CD<sub>3</sub>OD.

## Qualitative Analysis Report

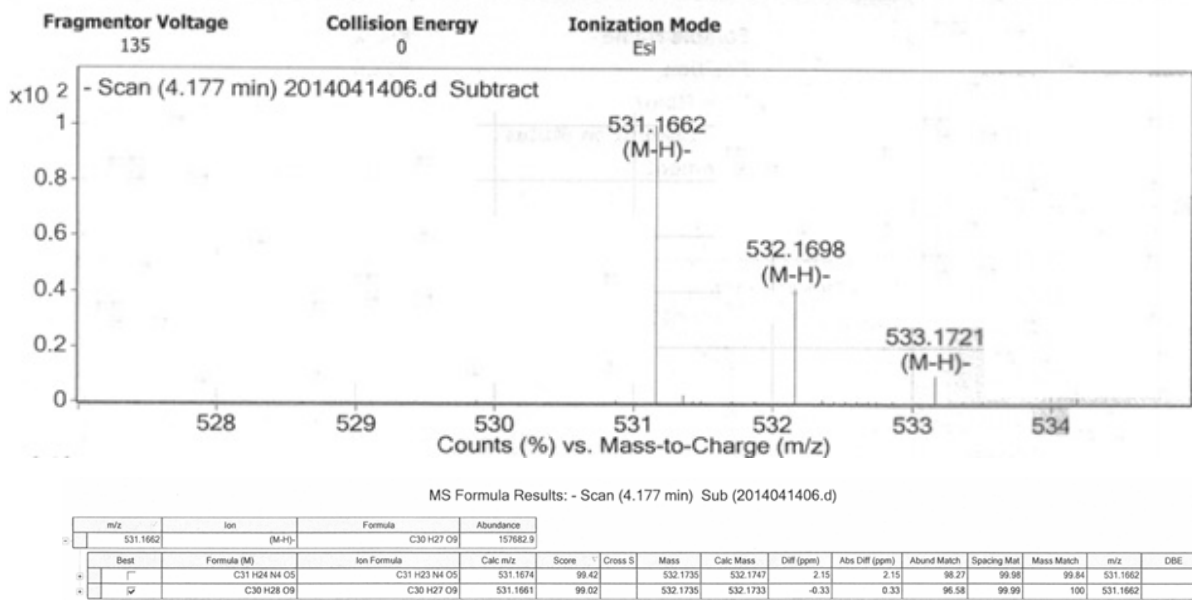

Figure S8. HRMS spectrum of compound (4).

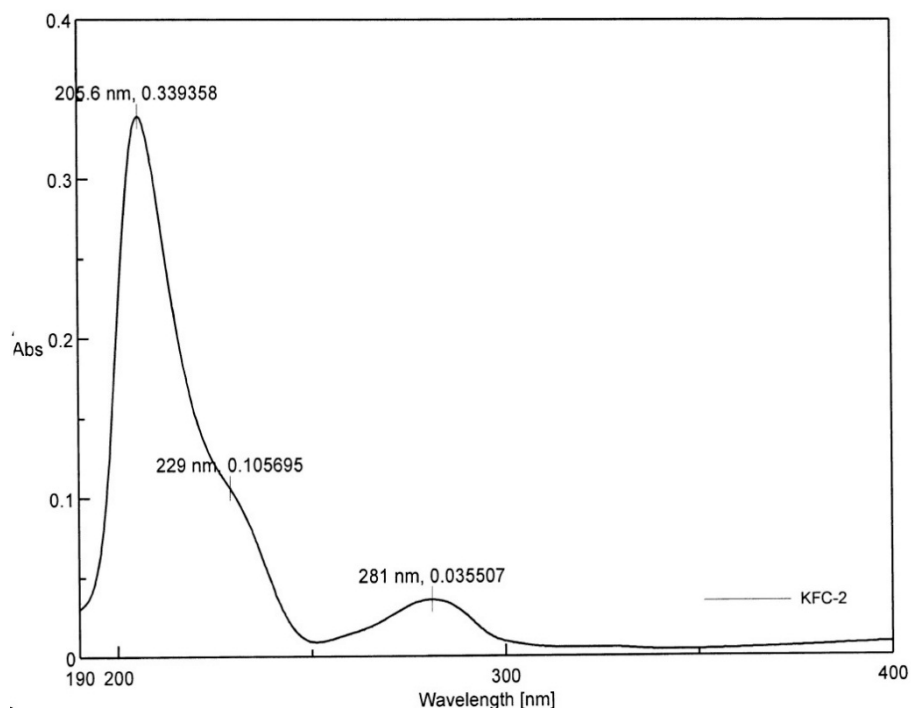

Figure S9. UV spectrum of compound (4) in CH<sub>3</sub>OH.

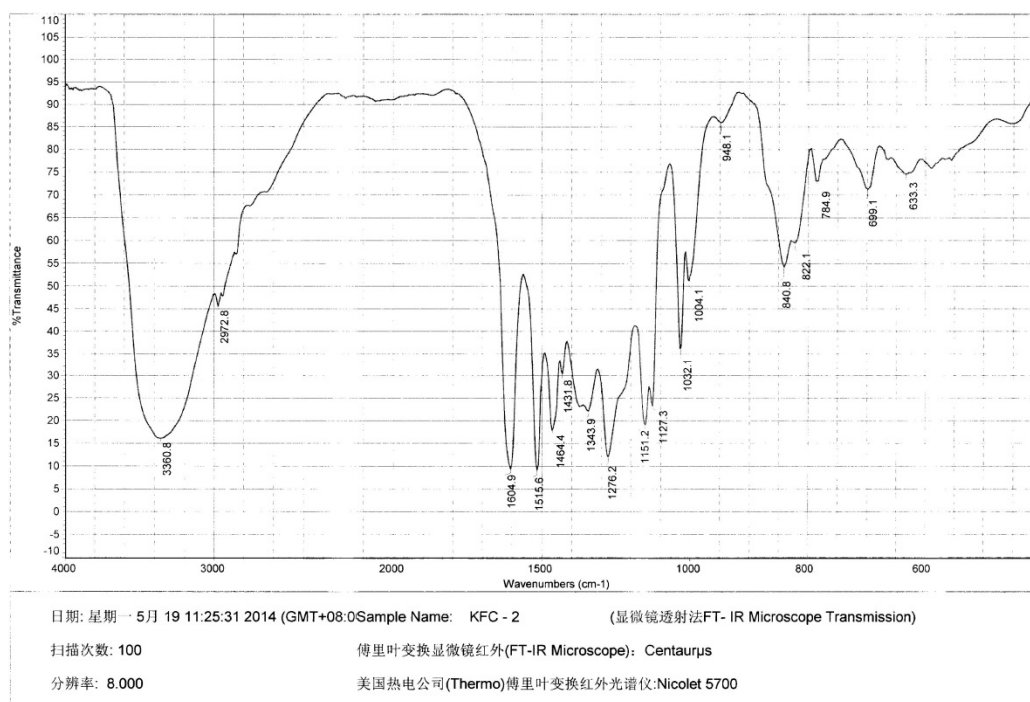

Figure S10. IR spectrum of compound (4).

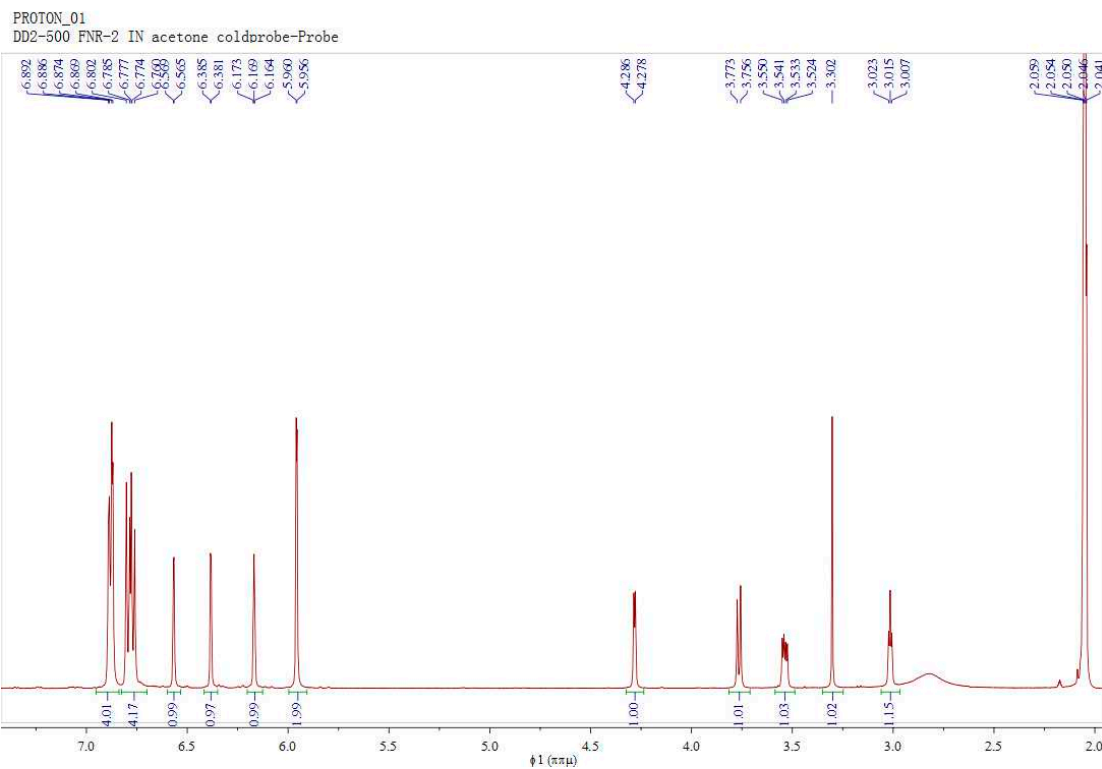

Figure S11.  $^1\text{H}$ -NMR spectrum of compound (6) in  $\text{CD}_3\text{COCD}_3$ .

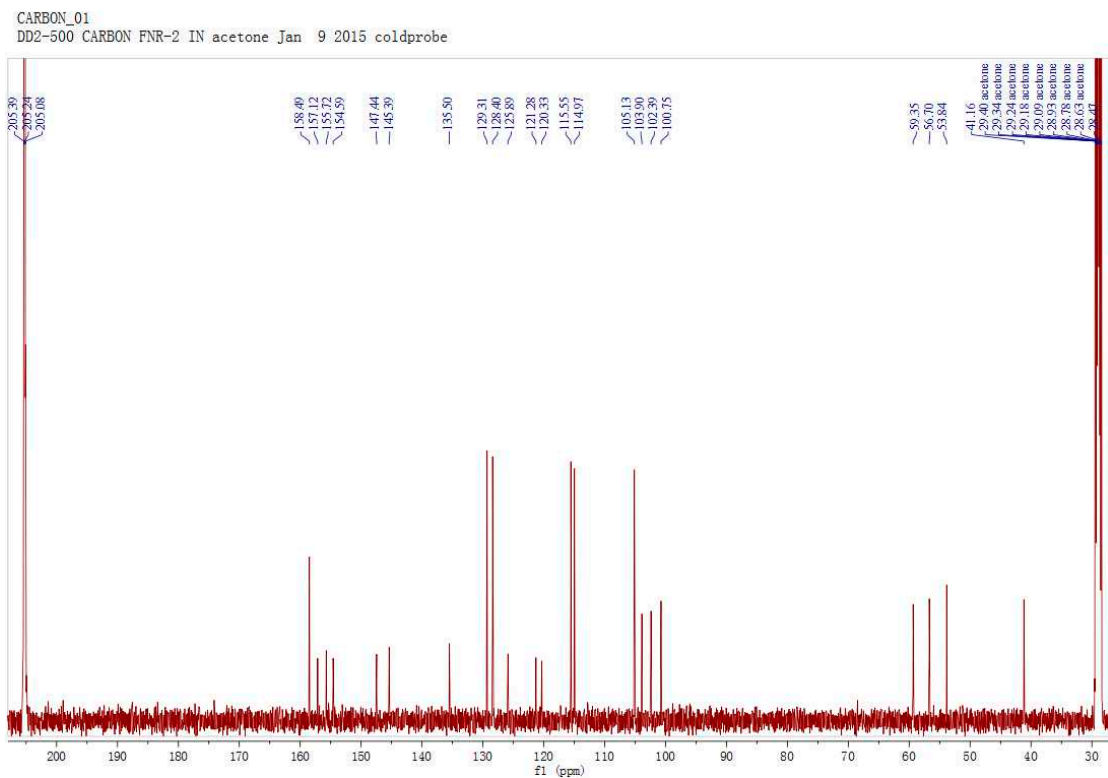

Figure S12.  $^{13}\text{C}$ -NMR spectrum of compound (6) in  $\text{CD}_3\text{COCD}_3$ .

DEPT\_01  
DD2-500 DEPT FNR-2 IN acetone Jan 9 2015 coldprobe

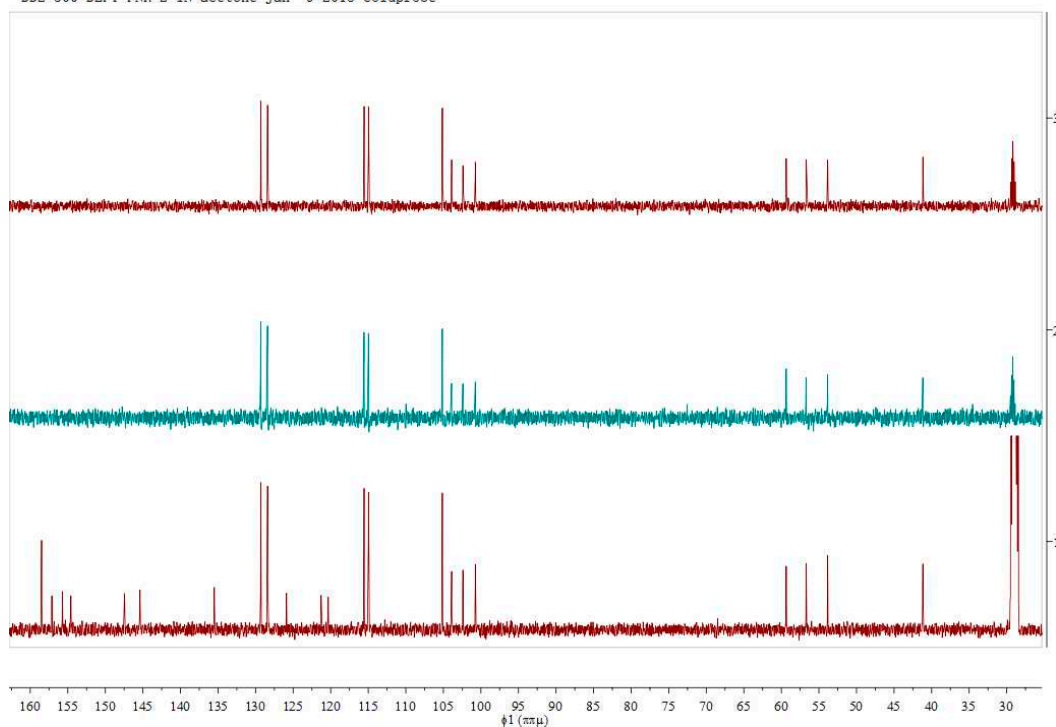

Figure S13. DEPT spectrum of compound (6) in CD<sub>3</sub>COCD<sub>3</sub>.

gHSQCAD\_01  
DD2-500 gHSQCAD FNR-2 IN acetone Mar 24 2015 coldprobe

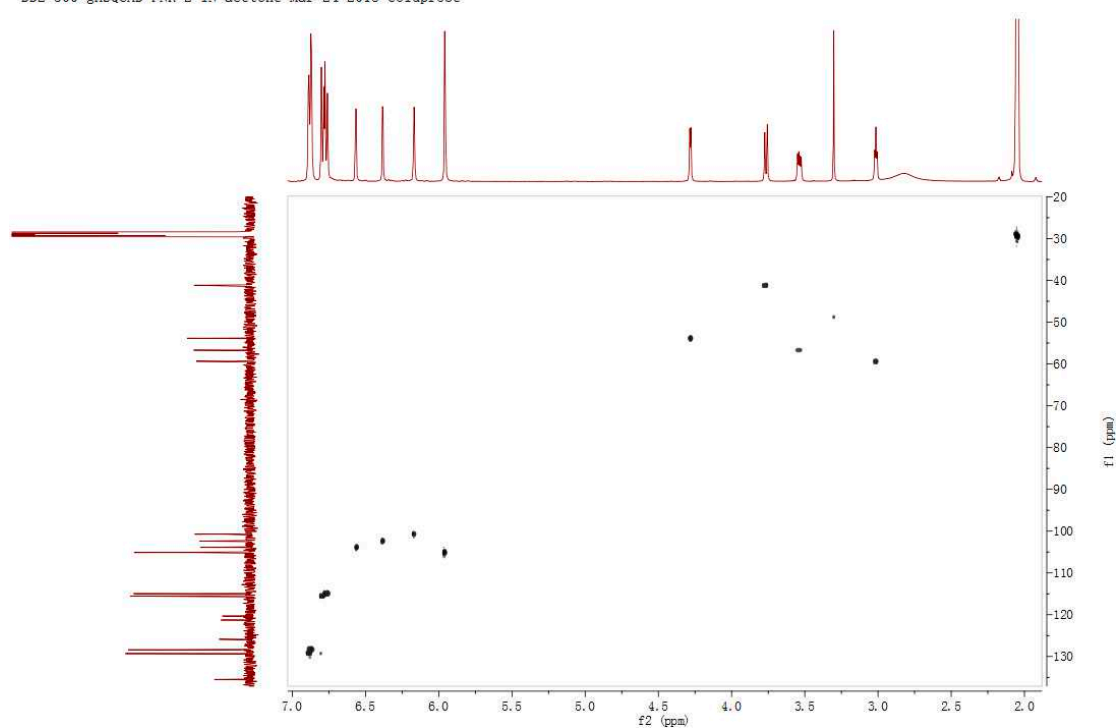

Figure S14. HSQC spectrum of compound (6) in CD<sub>3</sub>COCD<sub>3</sub>.

gHBCAD\_02  
DD2-500 FNR-2 IN acetone coldprobe-Probe

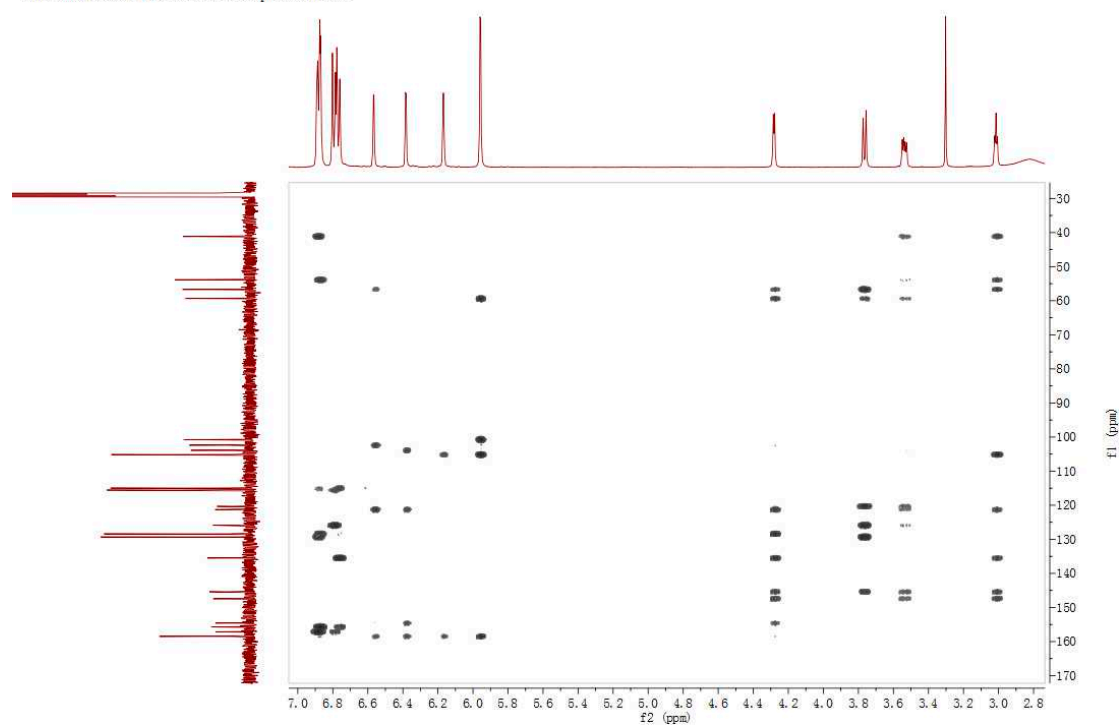

Figure S15. HMBC spectrum of compound (6) in  $\text{CD}_3\text{COCD}_3$ .

NOESY\_02  
DD2-500 NOESY FNR-2 IN acetone Jan 23 2015 coldprobe

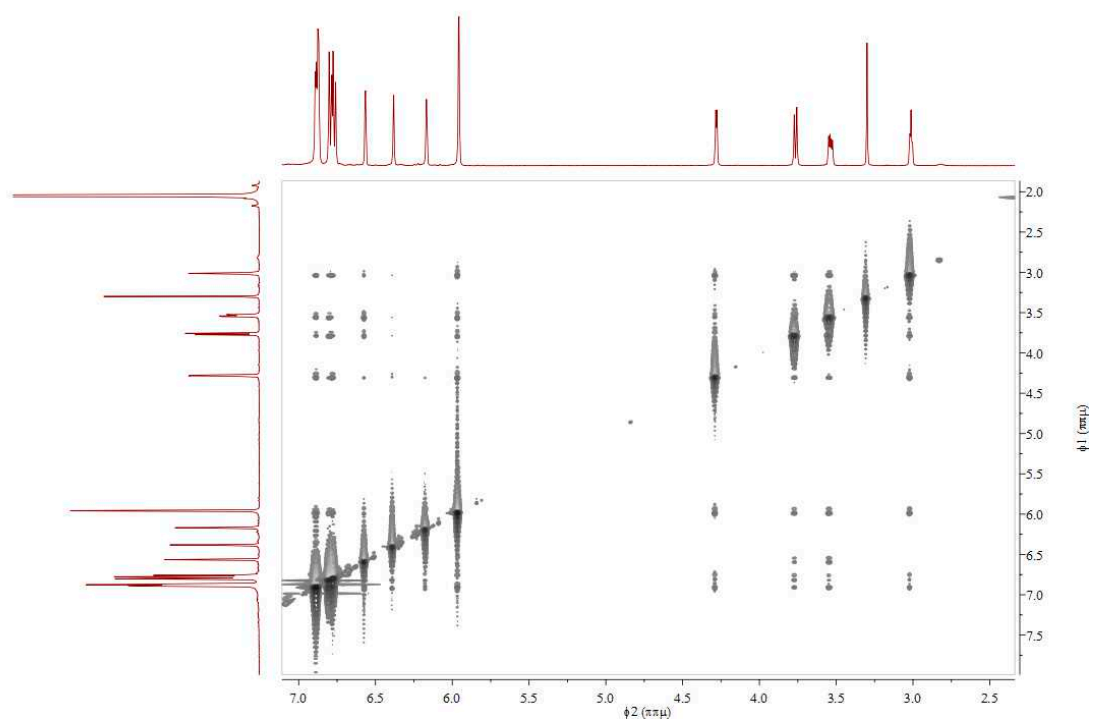

Figure S16. NOESY spectrum of compound (6) in  $\text{CD}_3\text{COCD}_3$ .



日期:2015-08-05  
仪器:API-TOFMS 10000 广州禾信分析仪器有限公司  
时间:

用户单位名称:中国医学科学院药物研究所  
样品名称:FNR-2  
离子模式:Positive

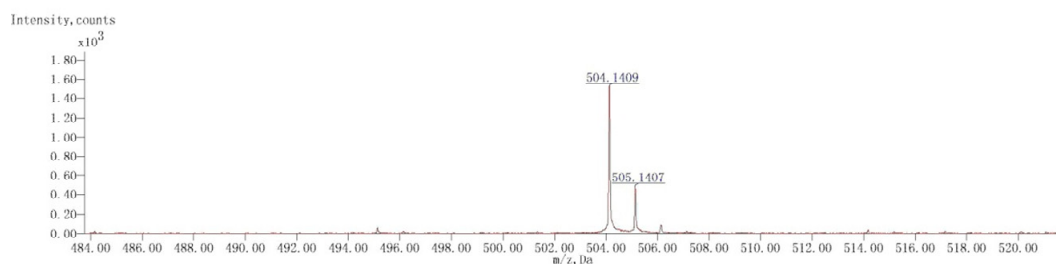

Figure S17. HRESIMS spectrum of compound (6).

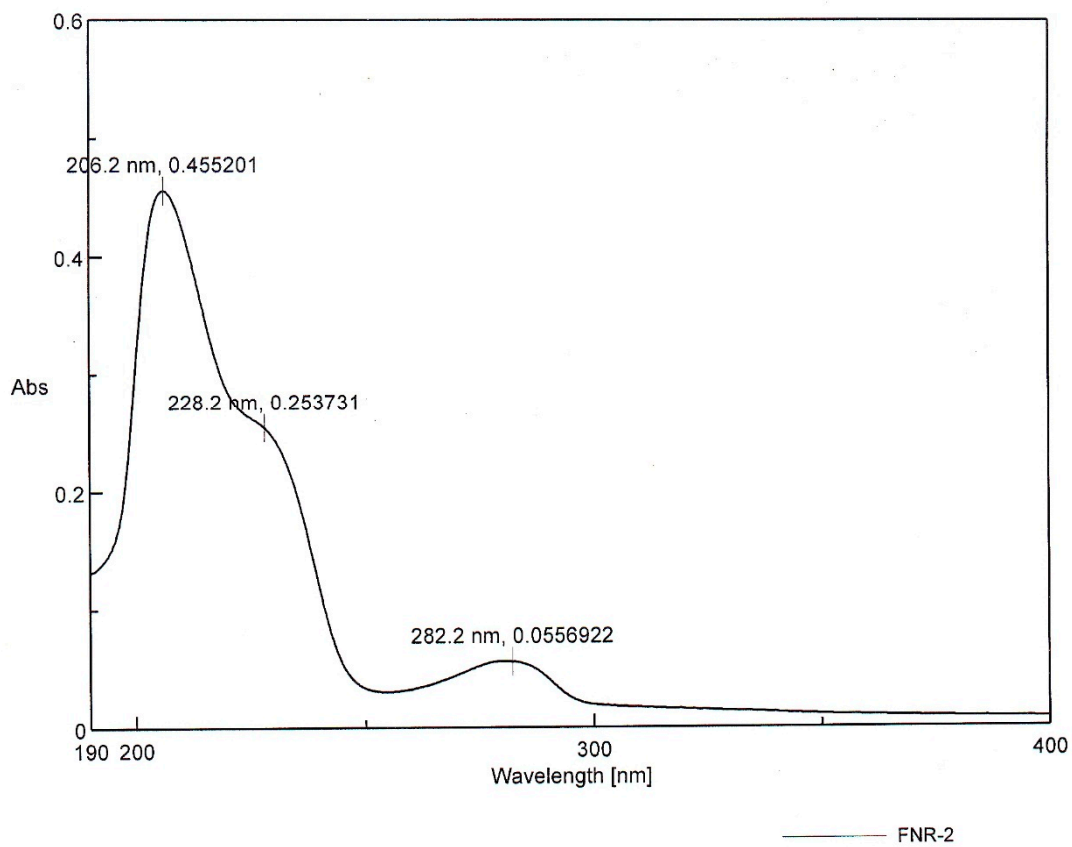

Figure S18. UV spectrum of compound (6) in CH<sub>3</sub>OH.

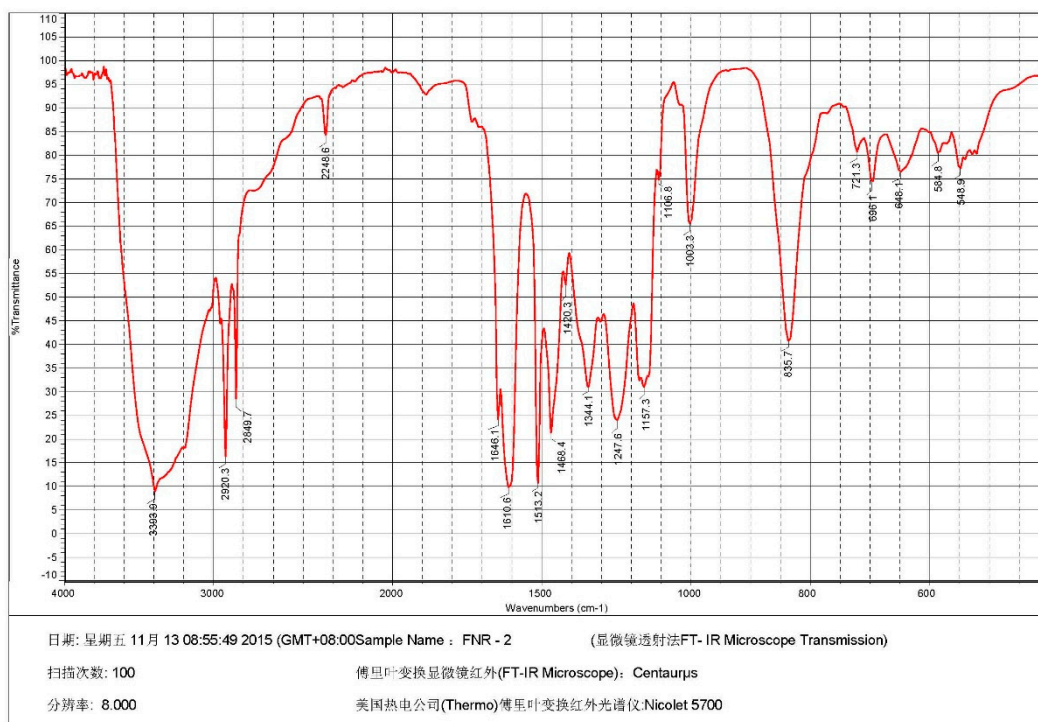

Figure S19. IR spectrum of compound (6).

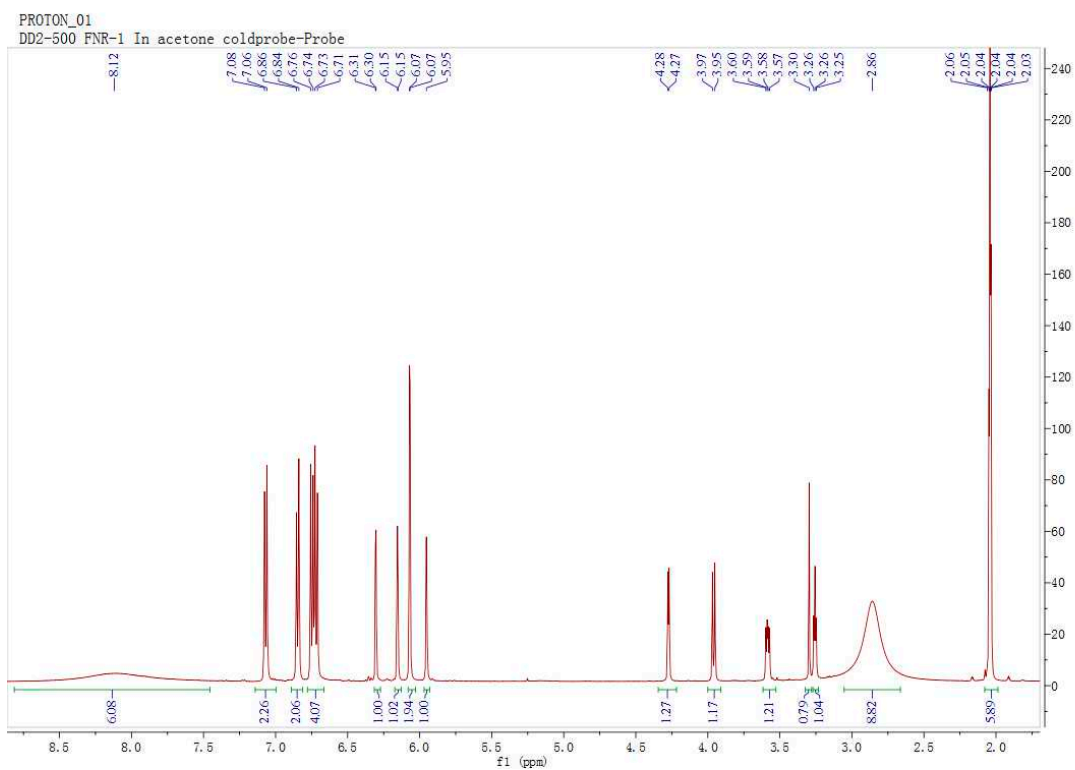

Figure S20.  $^1\text{H-NMR}$  spectrum of compound (7) in  $\text{CD}_3\text{COCD}_3$ .

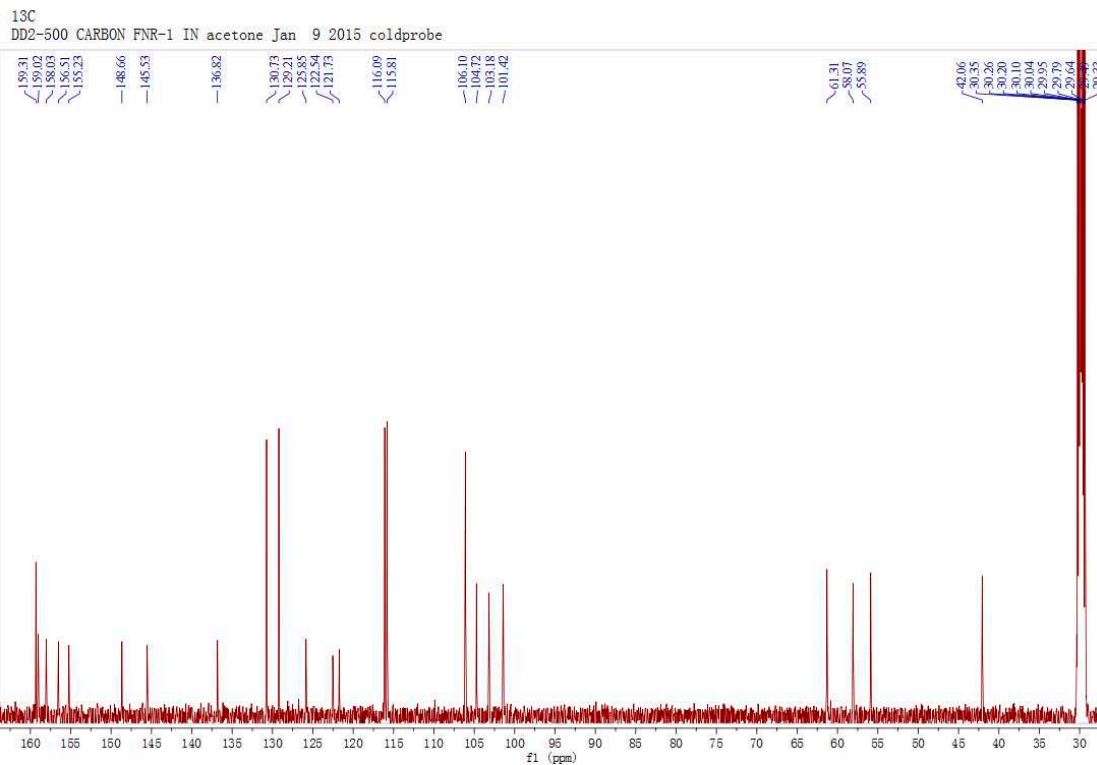

Figure S21.  $^{13}\text{C}$ -NMR spectrum of compound (7) in  $\text{CD}_3\text{COCD}_3$ .

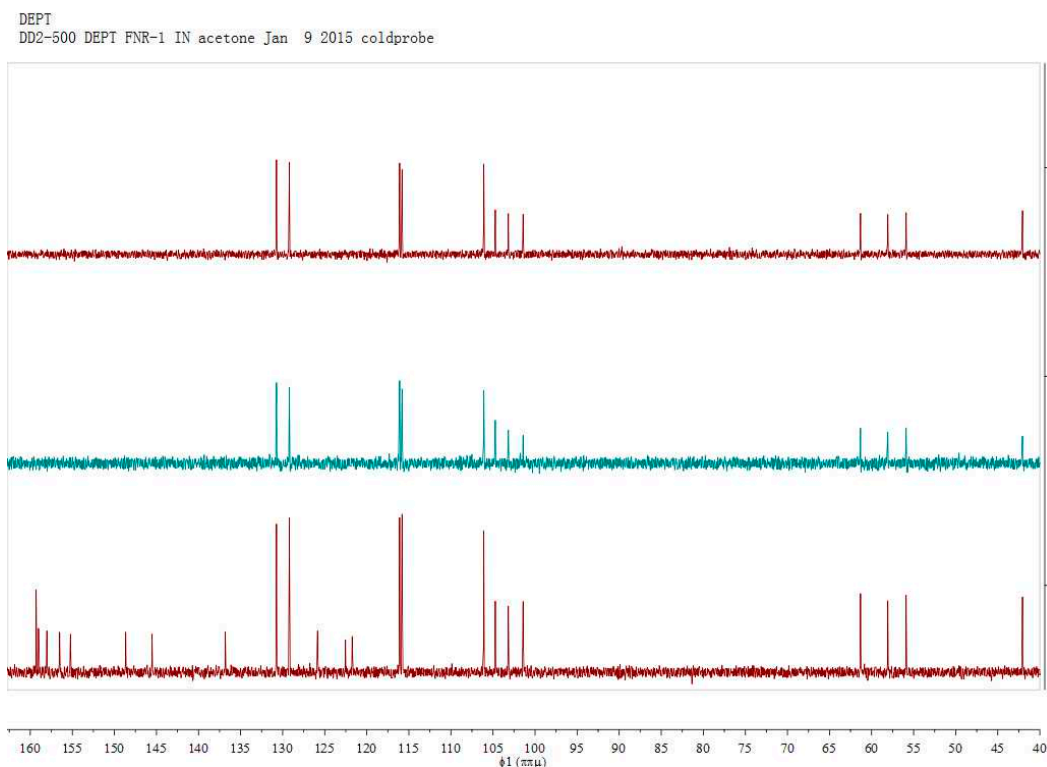

Figure S22. DEPT spectrum of compound (7) in  $\text{CD}_3\text{COCD}_3$ .

gHSQCAD\_01  
DD2-500 gHSQCAD FNR-1 IN acetone Mar 26 2015 coldprobe

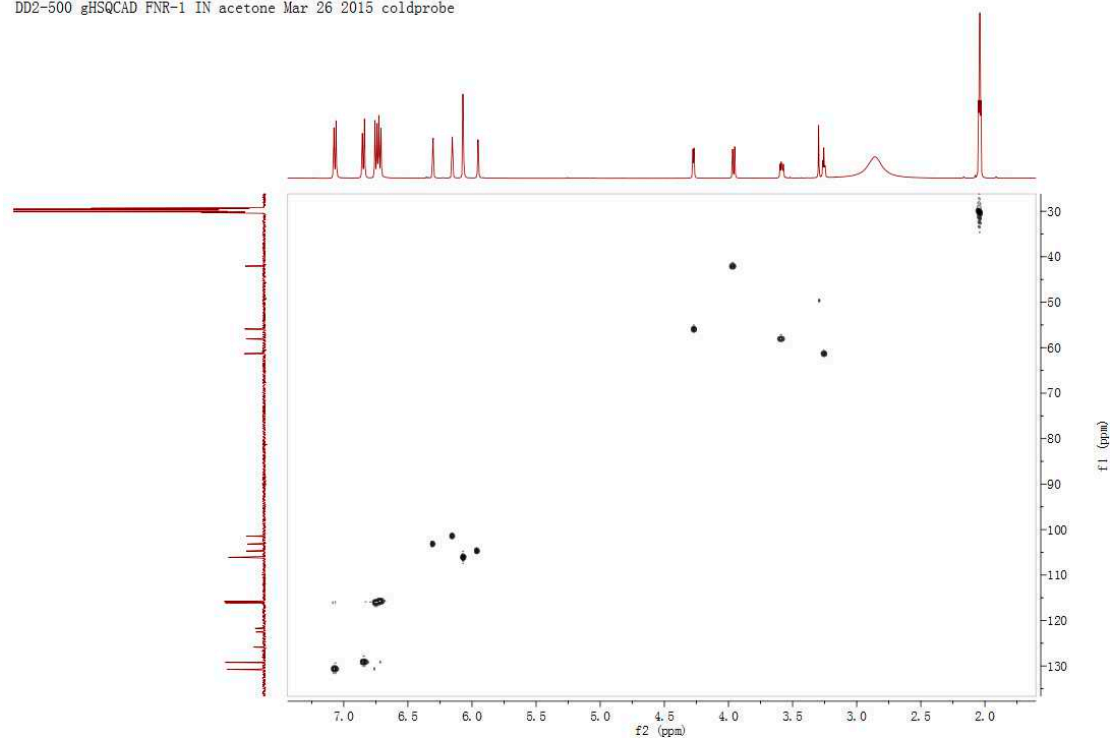

Figure S23. HSQC spectrum of compound (7) in CD<sub>3</sub>COCD<sub>3</sub>.

gHMBCAD\_01  
DD2-500 FNR-1 IN acetone coldprobe-Probe

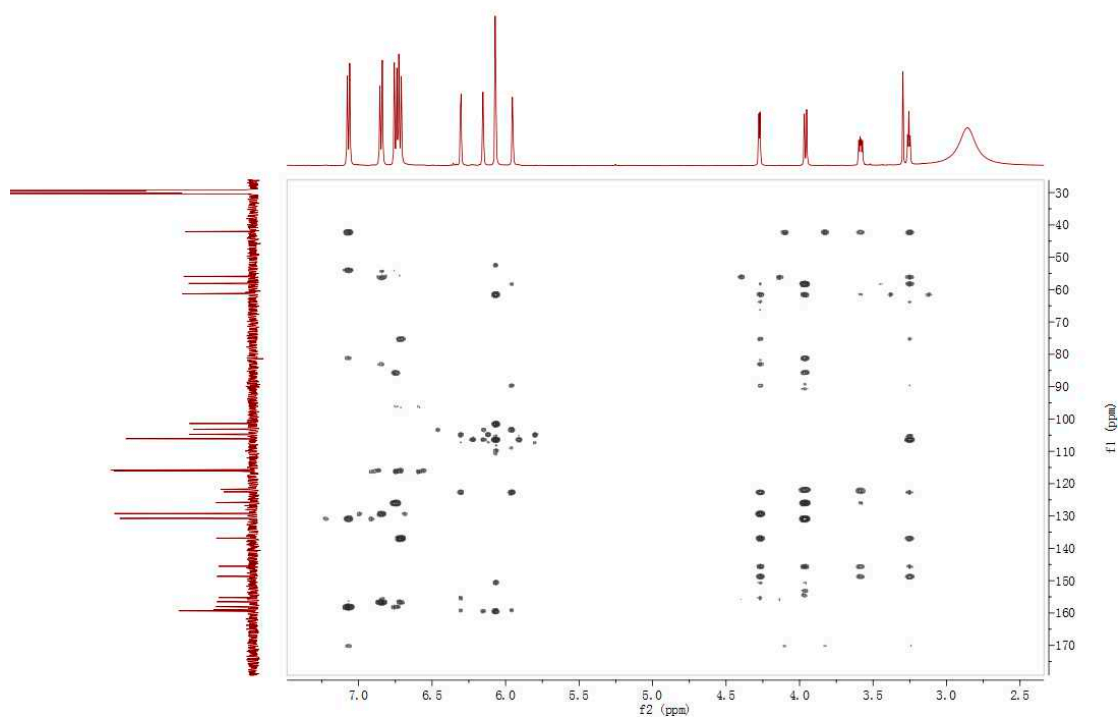

Figure S24. HMBC spectrum of compound (7) in CD<sub>3</sub>COCD<sub>3</sub>.

NOESY\_01  
DD2-500 FNR-1 IN acetone coldprobe-Probe

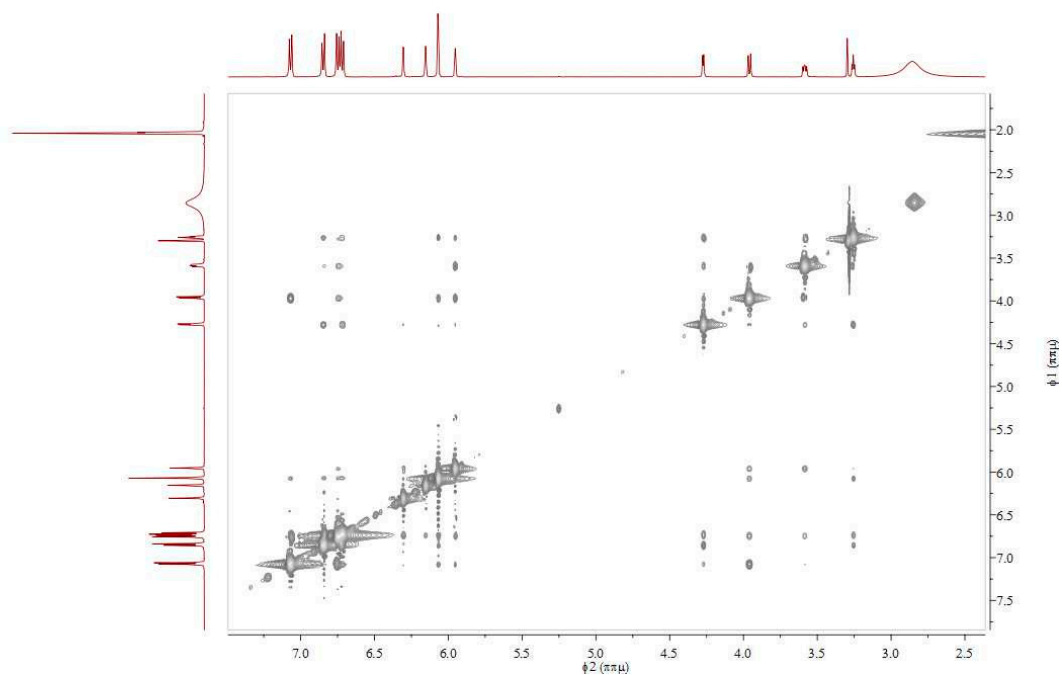

Figure S25. NOESY spectrum of compound (7) in  $\text{CD}_3\text{COCD}_3$ .

日期:2015-08-05  
仪器:API-TOFMS 10000 广州禾信分析仪器有限公司  
时间:

用户单位名称:中国医学科学院药物研究所  
样品名称:FNR-1  
离子模式:Positive

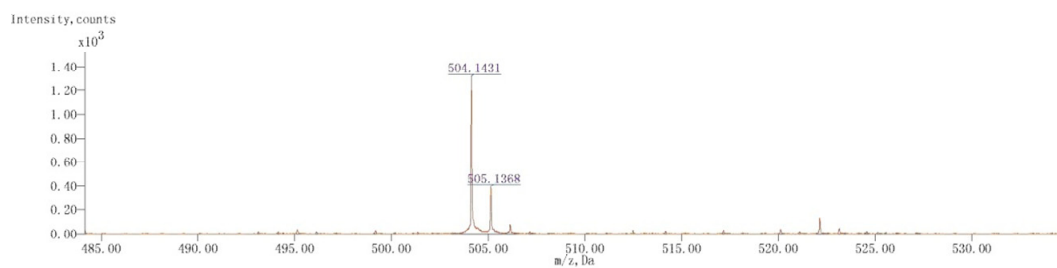

Figure S26. HRESIMS spectrum of compound (7).

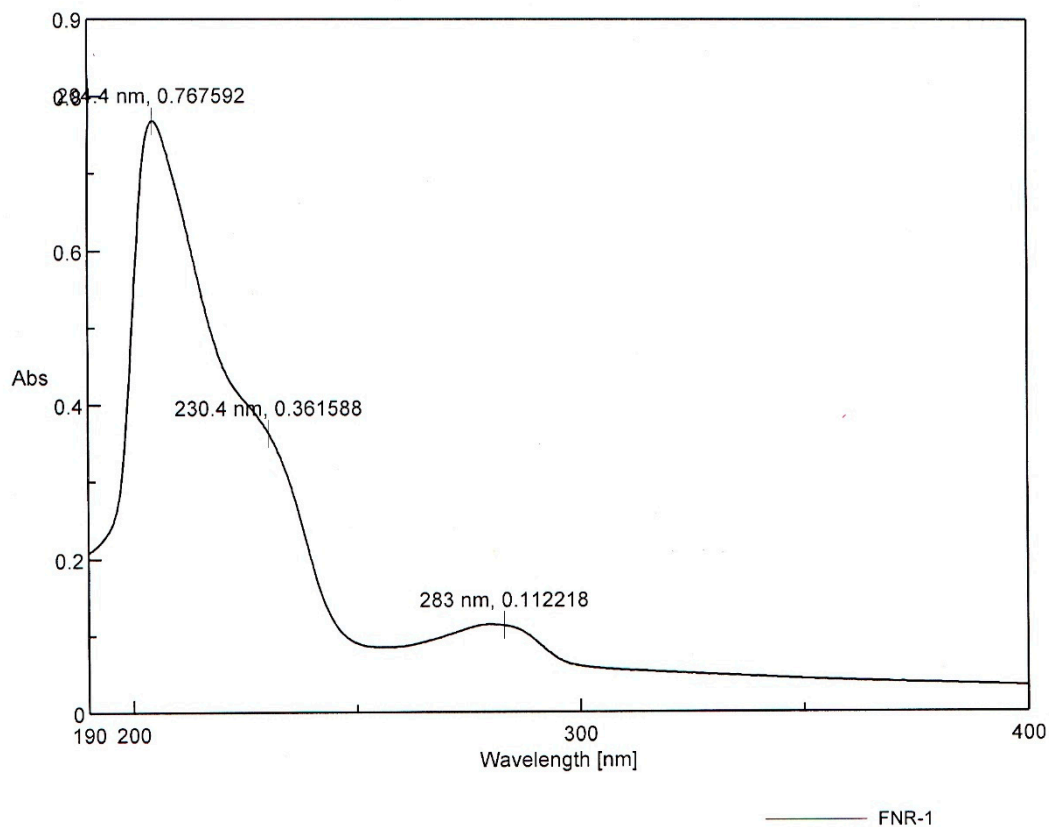

Figure S27. UV spectrum of compound (7) in CH<sub>3</sub>OH.

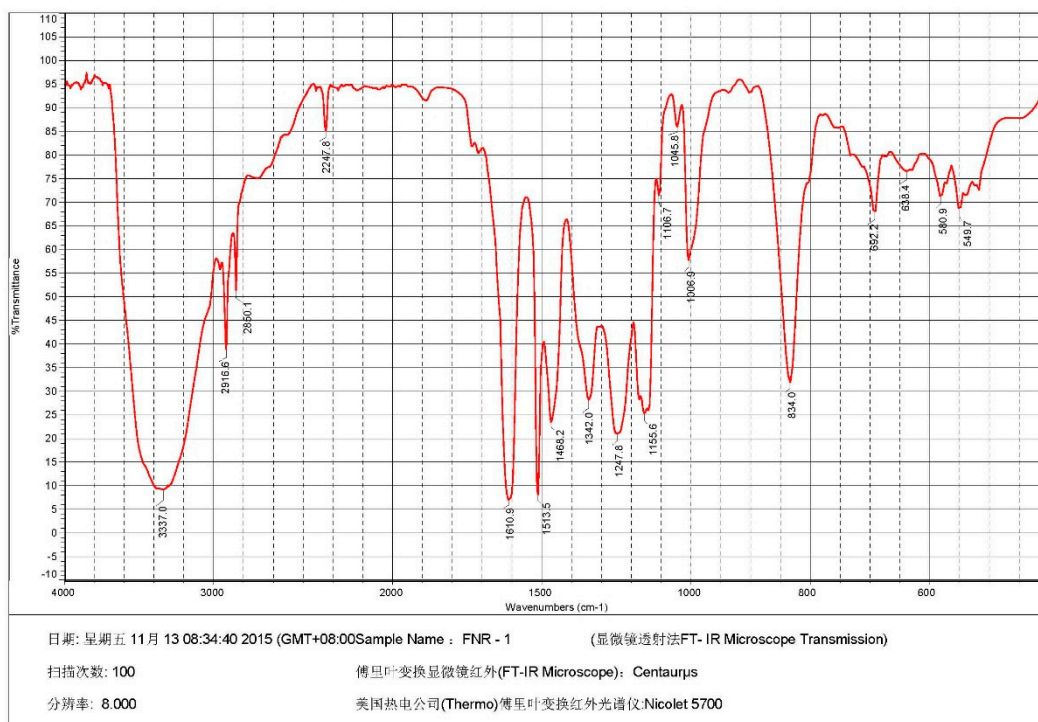

Figure S28. IR spectrum of compound (7).
